# Supplementary material
Source: PubMed Central journal article supplement (PMC7414047)
Supplement: pnas.2005871117.sapp.pdf [file pnas.2005871117.sapp.pdf]

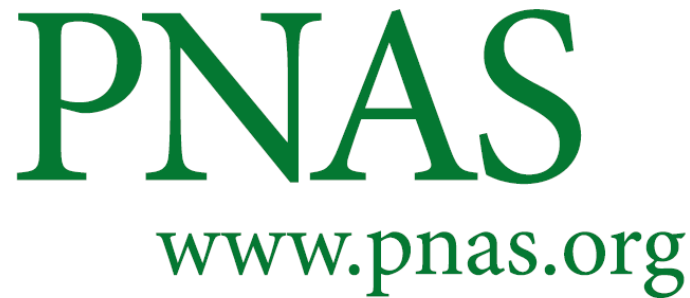

Supplementary Information for

**Light modulates the gravitropic responses through organ-specific PIFs and HY5 regulation of *LAZY4* expression in *Arabidopsis***

Panyu Yang<sup>a</sup>, Qiming Wen<sup>a</sup>, Renbo Yu<sup>a,1</sup>, Xue Han<sup>a</sup>, Xing Wang Deng<sup>a,b,2</sup>, and Haodong Chen<sup>a,2</sup>

<sup>a</sup>State Key Laboratory of Protein and Plant Gene Research, School of Advanced Agricultural Sciences and School of Life Sciences, Peking-Tsinghua Center for Life Sciences, Peking University, Beijing 100871, China

<sup>b</sup>Institute of Plant and Food Sciences, Department of Biology, Southern University of Science and Technology, Shenzhen 518055, China

<sup>1</sup>Present address: Vegetable Research Center, Tropical Crops Genetic Resources Institute, Chinese Academy of Tropical Agricultural Sciences, Haikou 571101, China

<sup>2</sup>To whom correspondence may be addressed: [deng@pku.edu.cn](mailto:deng@pku.edu.cn) or [chenhaodong@pku.edu.cn](mailto:chenhaodong@pku.edu.cn)

ORCID: 0000-0002-2046-0093 (P.Y.), 0000-0001-9411-9974 (Q.W.), 0000-0002-3014-9733 (X.H.), 0000-0001-8709-1467 (X.W.D.), 0000-0001-7228-6341 (H.C.)

**This PDF file includes:**

Figures S1 to S5

Tables S1

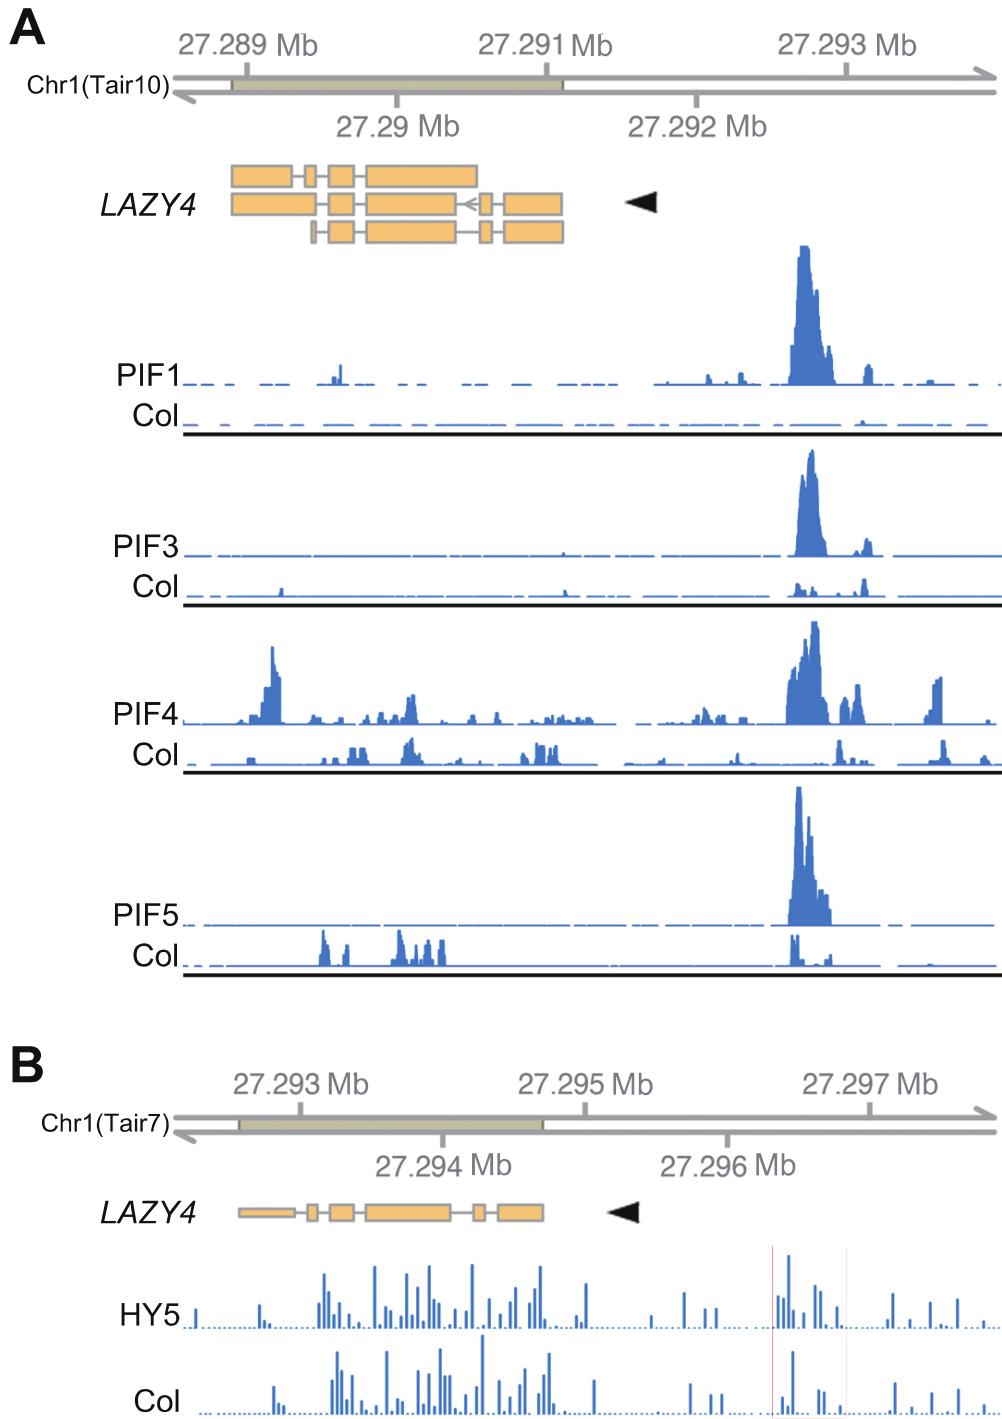

**Fig. S1.** Peak graphs showing the published results of ChIP assays for PIFs (*A*) and HY5 (*B*) at the *LAZY4* promoter. The orange bars indicate the *LAZY4* transcripts annotated in TAIR10 or TAIR7. The arrowheads indicate the direction of transcription.



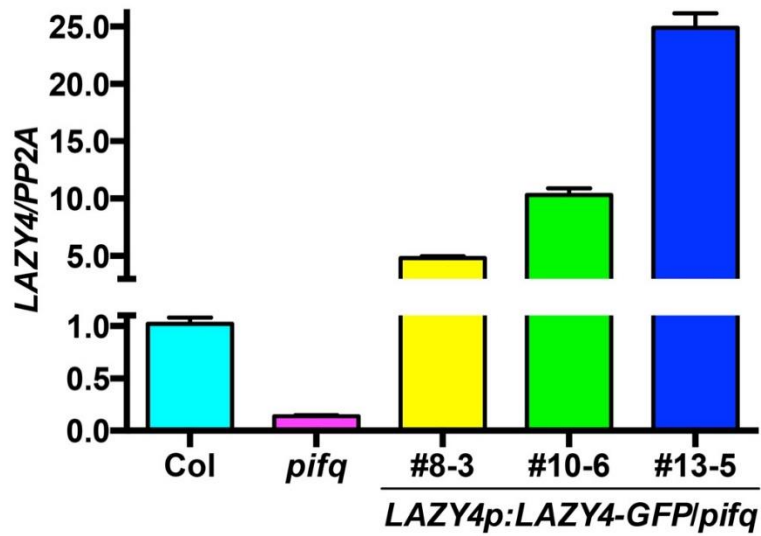

**Fig. S3.** Transcript levels of *LAZY4* in the hypocotyls of Col, *pifq*, and three *LAZY4p:LAZY4-GFP/pifq* transgenic lines. Total RNA was extracted from hypocotyls of 4-day-old dark-grown seedlings. Transcript levels were examined by qRT-PCR. Error bars represent the SD of three technical replicates. These experiments were repeated three times, and a representative result is shown.

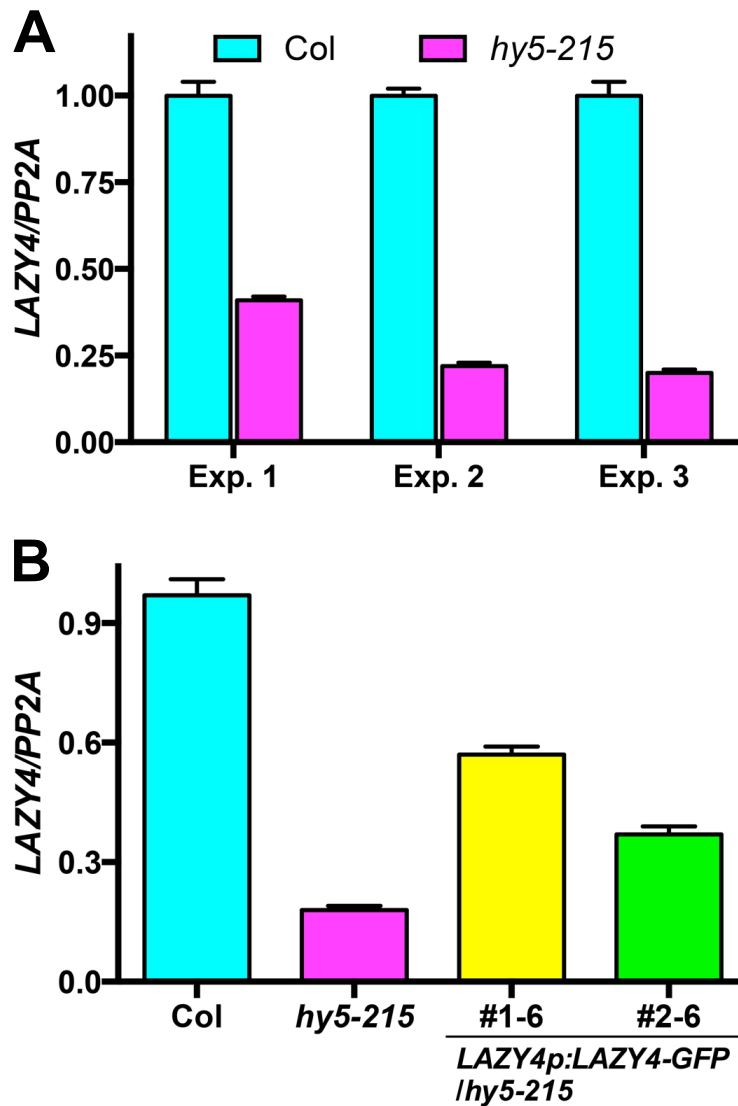

**Fig. S4.** Transcript levels of *LAZY4* in *Arabidopsis* roots. (A) Transcript levels of *LAZY4* in the root tips of Col and *hy5-215*. (B) Transcript levels of *LAZY4* in the roots of Col, *hy5-215*, and two *LAZY4p:LAZY4-GFP/hy5-215* transgenic lines. Total RNA was extracted from root tips (about 1mm length) (A) or whole roots (B) of 4-day-old seedlings grown in white light. Transcript levels were examined by qRT-PCR. Error bars represent the SD of three technical replicates. These experiments were repeated three times, and three repeats (Exp.1, Exp. 2 and Exp.3) are shown (A) or a representative result is shown (B).

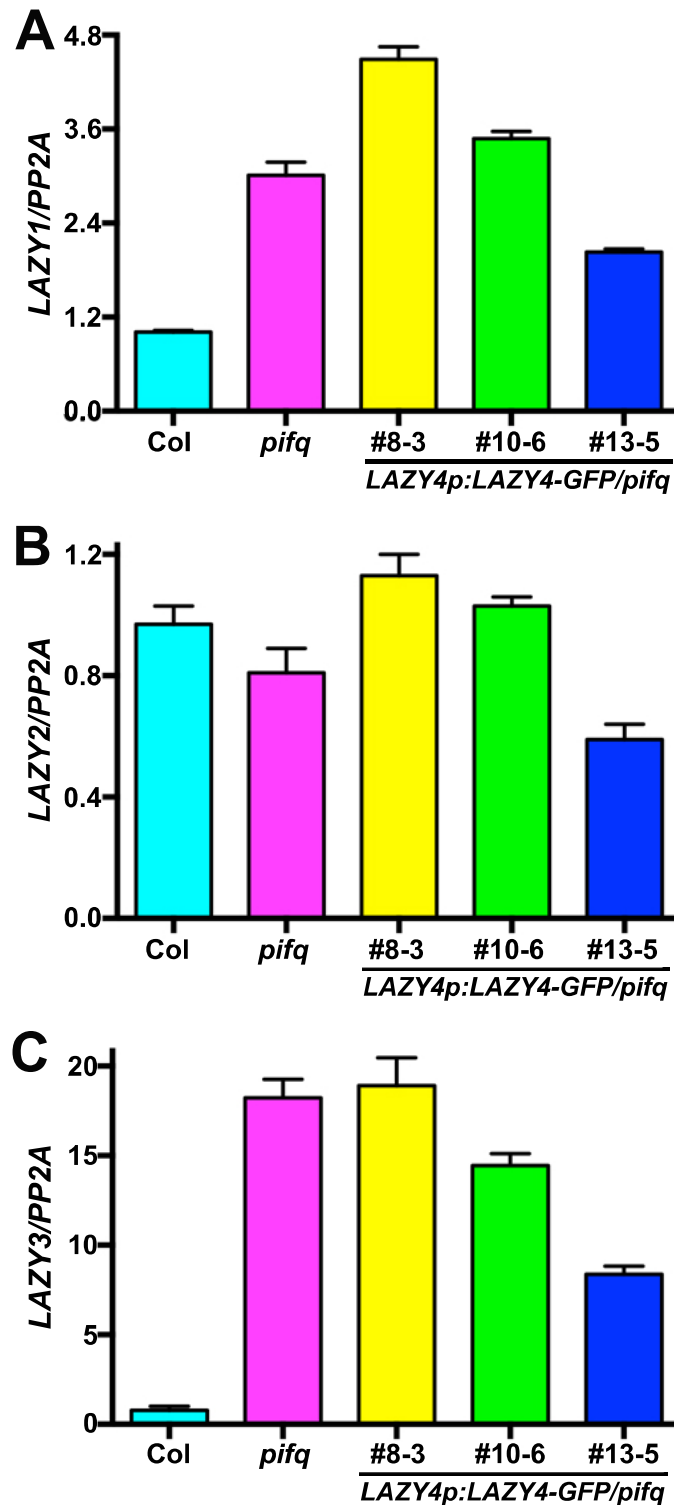

**Fig. S5.** Transcript levels of *LAZY1*, *LAZY2* and *LAZY3* in the hypocotyls of *Col*, *pifq*, and three *LAZY4p:LAZY4-GFP/pifq* transgenic lines. Total RNA was extracted from hypocotyls of 4-day-old dark-grown seedlings. Transcript levels were examined by qRT-PCR. Error bars represent the SD of three technical replicates. These experiments were repeated three times, and a representative result is shown.

**Table S1. List of primers in this study.**

A. List of primers for generating constructs.

| Construct                 | Primer    | Sequence                             |
|---------------------------|-----------|--------------------------------------|
| LAZY4p-a: LacZ            | EcoRI-a-F | ATACGAATTCactttaaatagatttttag        |
|                           | SalI-a-R  | ATACGTCGACttctttatacagtcacaac        |
| LAZY4p-b: LacZ            | EcoRI-b-F | ATACGAATTCcttccagttctctcaccta        |
|                           | SalI-b-R  | ATACGTCGACctgtataaaagtactattaag      |
| LAZY4p-c: LacZ            | EcoRI-c-F | ATACGAATTCaattcaatcaaaggagatca       |
|                           | SalI-c-R  | ATACGTCGACtgaactataaaaaaaatcg        |
| LAZY4p-c(mACE7):<br>LacZ  | mACE7-F   | ttcGGGGgattgggagtggtgcggtgggctcaact  |
|                           | mACE7-R   | accactccaatccccgaactcaggtccaat       |
| LAZY4p-c(mACE8):<br>LacZ  | mACE8-F   | aatgGGGGggagaatgtcgattggacctgagttc   |
|                           | mACE8-R   | tcgacattctccccccatttttcccacccccg     |
| LAZY4p-c(mACE9):<br>LacZ  | mACE9-F   | gaatGGGGgtctttctcaccataattagtttg     |
|                           | mACE9-R   | tggtgagaaagacccccattctaaggtaaaaagggt |
| LAZY4p-c(mACE10):<br>LacZ | mACE10-F  | tatGGGGatagcttgtgcataaactatgatatgtac |
|                           | mACE10-R  | atgcacaagctatccccataaaatacttta       |
| LAZY4p-c(mACE11):<br>LacZ | mACE11-F  | gattaacatGGGGtgTTTTTaaagtatttta      |
|                           | mACE11-R  | taaaaaacaccccatgtaatacaaatatattat    |
| LAZY4p-c(mACE12):<br>LacZ | mACE12-F  | gttaGGGGaagaacaagttccatggggaccaata   |
|                           | mACE12-R  | gaacttggttctccctaacttctctatcgc       |

B. List of EMSA probe primers.

| Probe | Primer         | Sequence                                 |
|-------|----------------|------------------------------------------|
| ACE8  | ACE8-FP-label  | gatgggaaaaatgACGTggagaatgtcgat/3biotin/  |
|       | ACE8-RP        | atcgacattctccacgtcattttccatc             |
|       | mACE8-FP-label | gatgggaaaaatgGGGGggagaatgtcgat /3biotin/ |
|       | mACE8-RP       | atcgacattctccccccattttccatc              |
| ACE9  | ACE9-FP-label  | taccttagaatACGTgtctttctcaccat/3biotin/   |
|       | ACE9-RP        | atggtgagaaagacacgtattctaaggta            |
|       | mACE9-FP-label | taccttagaatGGGGgtctttctcaccat/3biotin/   |
|       | mACE9-RP       | atggtgagaaagacccccattctaaggta            |

C. List of qRT-PCR and ChIP-qPCR Primers.

| Gene        | Primer | Sequence               |
|-------------|--------|------------------------|
| <i>PIL1</i> | Q6-QF  | ATAACACAAAGGGGTGGATG   |
|             | Q6-QR  | GTGAGTGACATGCGAGAGAG   |
|             | Q10-QF | ACGTGACTCTTTTCTTGACAG  |
|             | Q10-QR | CGCTGTACTIONCGGTCTCATA |

|                 |             |                            |
|-----------------|-------------|----------------------------|
| <i>18S rRNA</i> | 18S rRNA-QF | GCTAACTAGCTACGTGGAGG       |
|                 | 18S rRNA-QR | CATCTAAGGGCATCACAGAC       |
| <i>LAZY4</i>    | P1-QF       | GATGGGAAAAATGACGTGGA       |
|                 | P1-QR       | AGCAGTTTCGCTTTATCATC       |
|                 | P2-QF       | CAATGCTCGTTTGTTTAAGC       |
|                 | P2-QR       | GCTTTATCATCGGAGAGTTGA      |
|                 | ACE8-QF     | GTCTTTCTCACCATAATTAG       |
|                 | ACE8-QR     | GAACTCAGGTCCAATCGACA       |
|                 | ACE9-QF     | GCCGTTGAAAGTCAACCTGA       |
|                 | ACE9-QR     | GCTTAAACAAACGAGCATTG       |
|                 | LAZY4-QF    | TTTTCGGGTGGATGCAGAAC       |
|                 | LAZY4-QR    | ACCAATCGCGAGTAATCCGT       |
| <i>LAZY1</i>    | LAZY1-QF    | GCAACTGAAGCACGAAAATG       |
|                 | LAZY1-QR    | TGGAATAGCTGTTGCCAGTAGA     |
| <i>LAZY2</i>    | LAZY2-QF    | GCGCAGATGGGATTTCTACA       |
|                 | LAZY2-QR    | GATGTTGGTTTCGAGGAGGC       |
| <i>LAZY3</i>    | LAZY3-QF    | CGTGTGCCTACTTCAGATTCT      |
|                 | LAZY3-QR    | TCTTCGTCTTGAGGCAAACC       |
| <i>PP2A</i>     | PP2AA3-QF   | TATCGGATGACGATTCTTCGTGCAG  |
|                 | PP2AA3-QR   | GCTTGGTTCGACTATCGGAATGAGAG |
